# Supplementary material
Source: Springer Nature journal article supplement (https://www.springermedizin.de/resource/supplementary/12916_2011_402_MOESM1_ESM.pdf/9599884)

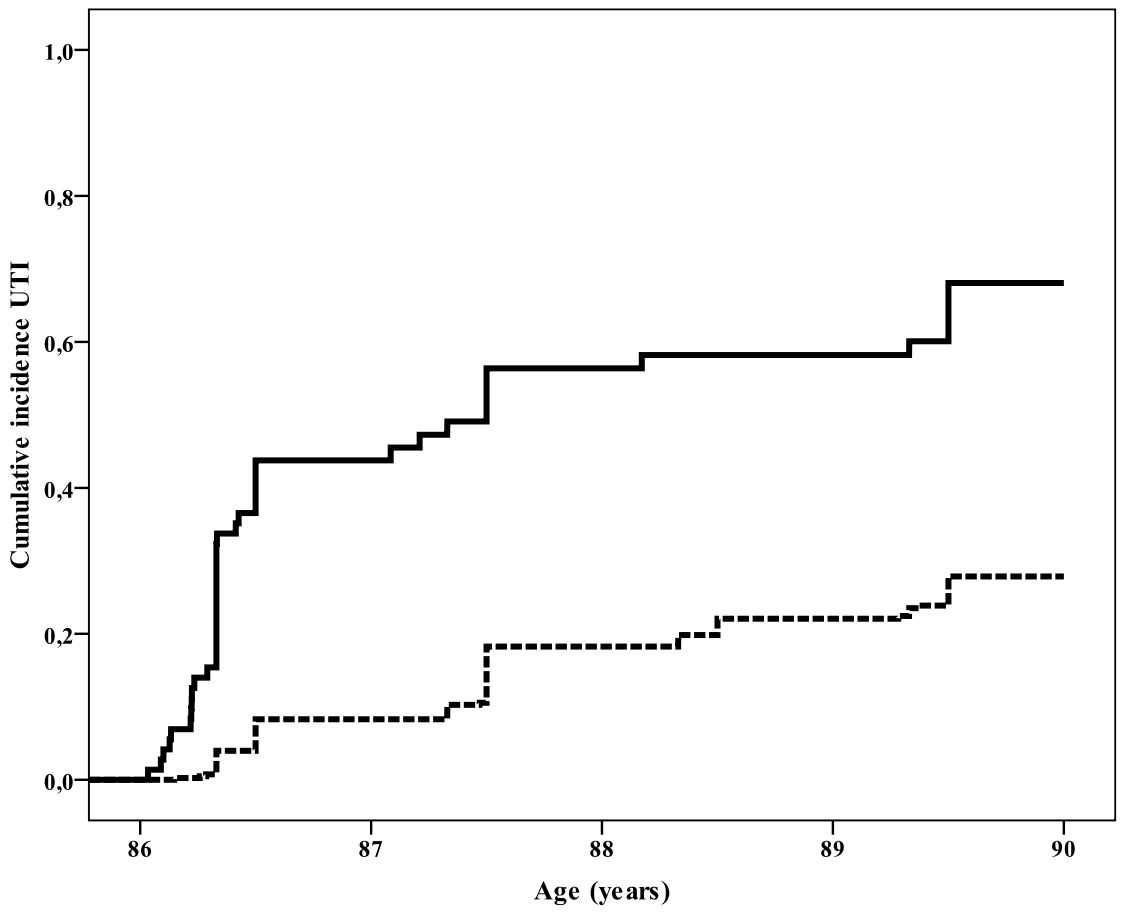

|        |     |     |     |     |     |
|--------|-----|-----|-----|-----|-----|
| UTI    | 72  | 50  | 43  | 38  | 30  |
| No UTI | 407 | 370 | 319 | 277 | 250 |

Supplement: MOESM1 [file 9599884]
